# Supplementary material for: Association of Atopic Dermatitis with Depression and Suicide: A Two-Sample Mendelian Randomization Study
Source: Biomed Res Int. 2022 Feb 3;2022:4084121. doi: 10.1155/2022/4084121 (PMC8831056; doi:10.1155/2022/4084121)
Supplement: Supplementary Materials — Table S1 Leave out analysis for the association between AD and major depression. Table S2 Leave out analysis for the association between AD and suicidal ideation or attempt. [file 4084121.f1.zip]

Archive with 2 entries (2 files):
- 4084121.f1/Table S1 Leave out analysis 0719.docx
- 4084121.f1/Table S2 Leave out analysis 0719.docx
